# Supplementary material
Source: Springer Nature journal article supplement (https://www.springermedizin.de/resource/supplementary/13012_2012_576_MOESM2_ESM.pdf/9630242)
Supplement: MOESM2 [file 9630242]

Enrolment

Assessing number of eligible PHCUs and providers

N PHCU not eligible

Randomization of at minimum 120 PHCUs

Allocation

1: 15 PHCU

controls

2: 15 PHCU

T&S

3: 15 PHCU

Financial

4: 15 PHCU

e-BI

5: 15 PHCU

T&S+

6: 15 PHCU

T&S+ e-BI

7: 15 PHCU

Financial + e-

8: 15 PHCU

T&S+

Follow-up

N PHCU lost to follow-up

Analysis

N PHCU analysed  
N Providers analysed
